# Supplementary material
Source: PubMed Central journal article supplement (PMC5828636)
Supplement: pnas.201721425SI.pdf [file pnas.201721425SI.pdf]

# Supporting Information

Li et al. 10.1073/pnas.1721425115

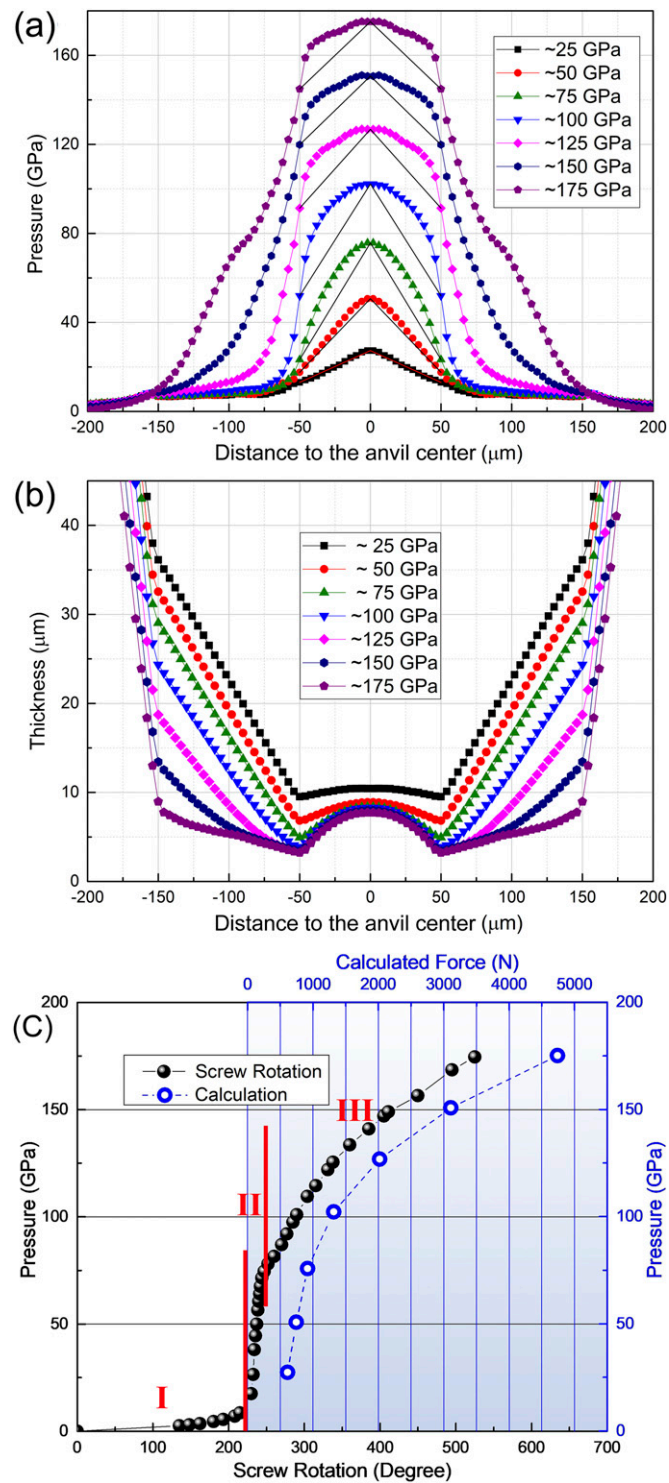

**Fig. S1.** Behavior of a 100- $\mu\text{m}$  beveled to 300- $\mu\text{m}$ -anvil DAC up to 175 GPa. Pressure distributions (A) and gasket-thickness variations (B) as a function of the radial distance from the center of the culet at seven different center pressures. (C) Pressure-loading curves, solid dots, and open circles are from the experiment and calculations, respectively.

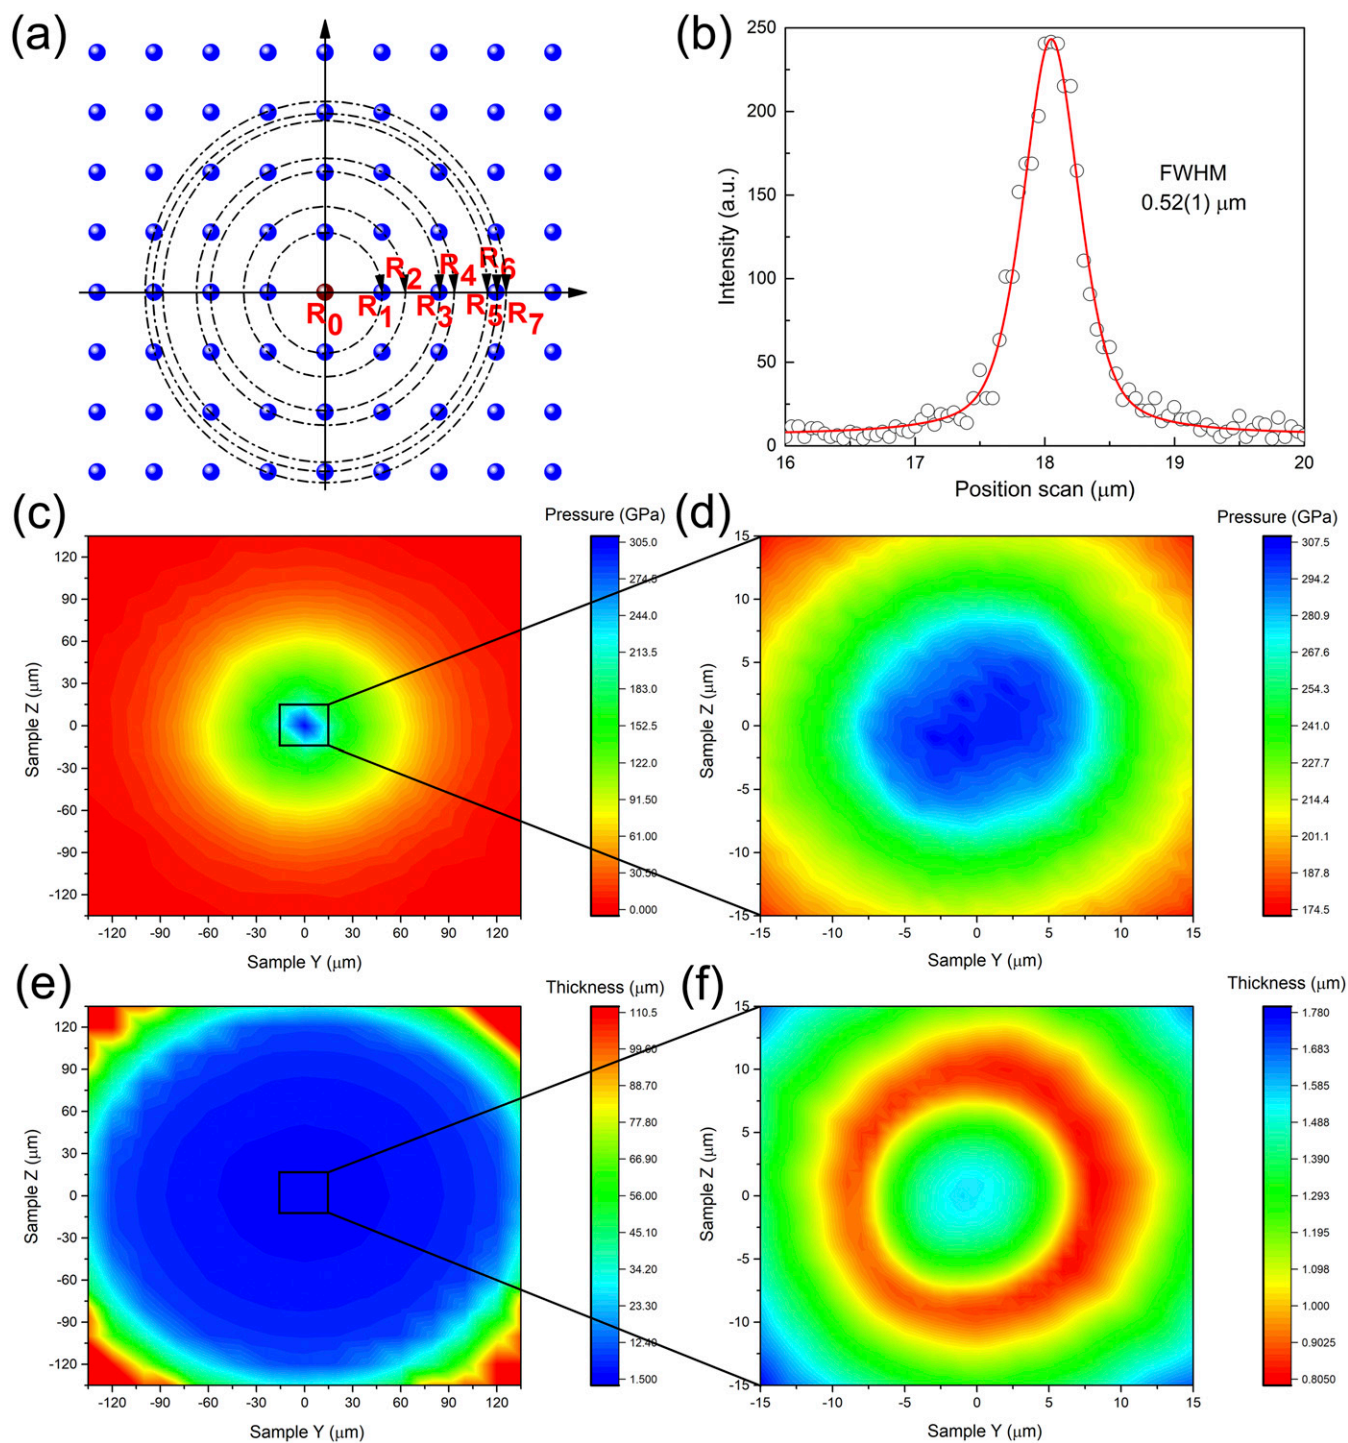

**Fig. S2.** Schematic diagram of 2D to 1D data conversion (A), typical submicrometer beam profile for 400-GPa experiment (B), and an example of 2D pressure (C and D) and thickness (E and F) mappings at  $\sim 300$  GPa.
